# Supplementary material for: Adipophilin and Perilipin 3 Correlate with Total Lipid Content in Human Breast Milk
Source: Preprints.org preprint supplement (doi:10.20944/preprints201810.0008.v1), 2018-10-01
Supplement: Supplementary file 1 [file supplementary]

Supplementary Material for

# Adipophilin and perilipin-3 levels in human breast milk correlate with the total lipid content

Tereza Pavlova1,2,*, Zdenek Spacil1, Veronika Vidova1, Filip Zlamal1,2, Eliska Cechova1, Zuzana Hodicka3, Julie Bienertova-Vasku1,2

*1Research Centre for Toxic Compounds in the Environment (RECETOX), Masaryk University, Czech Republic*

*2 Department of Pathological Physiology, Masaryk University, Faculty of Medicine, Brno, Czech Republic*

*3Department of Obstetrics and Gynaecology, University Hospital Brno, Brno, Czech Republic*

**Supplemental Table 1: Calibration parameters in matrix-matched solution**

| Peptide | LOD (nM) | LOQ (nM) | Linear range (nM) | Slope | Intercept | *R2* | *R2* norm |
| --- | --- | --- | --- | --- | --- | --- | --- |
| DSVASTITGVMDK | 1.583 | 4.796 | 5-400 | 122.766 | 633.893 | 0.977 | 0.994 |
| EVSDSLLTSSK | 1.049 | 3.178 | 5-400 | 261.882 | 1731.352 | 0.992 | 1.000 |
| DTVATQLSEAVDATR | 1.597 | 4.840 | 5-400 | 83.927 | 818.088 | 0.980 | 0.997 |

LOD, limit of detection; LOQ, limit of quantification; R2, Pearson Coefficient of Determination; R2 norm, Coefficient of Determination after adjusting for native peptide.

**Supplemental Table 2: SRM assay library for positive ion detection mode**

| **Peptide Name** | **ISTD1** | **Precursor Ion** | **Product Ion** | **ColisionEnergy(V)** | **RetentionTime (min)** |
| --- | --- | --- | --- | --- | --- |
| **DSVASTITGVMDK.heavy** | **Yes** | **666.3** | **1030.5** | **26.2** | **13.8** |
| DSVASTITGVMDK.heavy | Yes | 666.3 | 959.5 | 26.2 | 13.8 |
| DSVASTITGVMDK.heavy | Yes | 666.3 | 658.3 | 26.2 | 13.8 |
| DSVASTITGVMDK.heavy | Yes | 666.3 | 302.1 | 26.2 | 13.8 |
| DSVASTITGVMDK.heavy | Yes | 666.3 | 203.1 | 26.2 | 13.8 |
| **DSVASTITGVMDK.light** | **No** | **662.3** | **1022.5** | **26.2** | **13.8** |
| DSVASTITGVMDK.light | No | 662.3 | 951.5 | 26.2 | 13.8 |
| DSVASTITGVMDK.light | No | 662.3 | 650.3 | 26.2 | 13.8 |
| DSVASTITGVMDK.light | No | 662.3 | 302.1 | 26.2 | 13.8 |
| DSVASTITGVMDK.light | No | 662.3 | 203.1 | 26.2 | 13.8 |
| **DTVATQLSEAVDATR.heavy** | **Yes** | **793.9** | **971.5** | **29.8** | **14** |
| DTVATQLSEAVDATR.heavy | Yes | 793.9 | 858.4 | 29.8 | 14 |
| DTVATQLSEAVDATR.heavy | Yes | 793.9 | 642.4 | 29.8 | 14 |
| DTVATQLSEAVDATR.heavy | Yes | 793.9 | 472.2 | 29.8 | 14 |
| DTVATQLSEAVDATR.heavy | Yes | 793.9 | 217.1 | 29.8 | 14 |
| **DTVATQLSEAVDATR.light** | **No** | **788.9** | **961.5** | **29.8** | **14** |
| DTVATQLSEAVDATR.light | No | 788.9 | 848.4 | 29.8 | 14 |
| DTVATQLSEAVDATR.light | No | 788.9 | 632.3 | 29.8 | 14 |
| DTVATQLSEAVDATR.light | No | 788.9 | 462.2 | 29.8 | 14 |
| DTVATQLSEAVDATR.light | No | 788.9 | 217.1 | 29.8 | 14 |
| **EVSDSLLTSSK.heavy** | **Yes** | **587.3** | **945.5** | **23.9** | **7.3** |
| EVSDSLLTSSK.heavy | Yes | 587.3 | 543.3 | 23.9 | 7.3 |
| EVSDSLLTSSK.heavy | Yes | 587.3 | 430.2 | 23.9 | 7.3 |
| EVSDSLLTSSK.heavy | Yes | 587.3 | 329.2 | 23.9 | 7.3 |
| EVSDSLLTSSK.heavy | Yes | 587.3 | 242.2 | 23.9 | 7.3 |
| **EVSDSLLTSSK.light** | **No** | **583.3** | **937.5** | **23.9** | **7.3** |
| EVSDSLLTSSK.light | No | 583.3 | 535.3 | 23.9 | 7.3 |
| EVSDSLLTSSK.light | No | 583.3 | 422.2 | 23.9 | 7.3 |
| EVSDSLLTSSK.light | No | 583.3 | 321.2 | 23.9 | 7.3 |
| EVSDSLLTSSK.light | No | 583.3 | 234.1 | 23.9 | 7.3 |
| **IATSLDGFDVASVQQQR.heavy** | **Yes** | **923** | **1359.7** | **33.8** | **14.1** |
| IATSLDGFDVASVQQQR.heavy | Yes | 923 | 1040.5 | 33.8 | 14.1 |
| IATSLDGFDVASVQQQR.heavy | Yes | 923 | 826.4 | 33.8 | 14.1 |
| IATSLDGFDVASVQQQR.heavy | Yes | 923 | 755.4 | 33.8 | 14.1 |
| IATSLDGFDVASVQQQR.heavy | Yes | 923 | 569.3 | 33.8 | 14.1 |
| **IATSLDGFDVASVQQQR.light** | **No** | **918** | **1349.6** | **33.8** | **14.1** |
| IATSLDGFDVASVQQQR.light | No | 918 | 1030.5 | 33.8 | 14.1 |
| IATSLDGFDVASVQQQR.light | No | 918 | 816.4 | 33.8 | 14.1 |
| IATSLDGFDVASVQQQR.light | No | 918 | 745.4 | 33.8 | 14.1 |
| IATSLDGFDVASVQQQR.light | No | 918 | 559.3 | 33.8 | 14.1 |
| **SELLVEQYLPLTEEELEK.heavy** | **Yes** | **724** | **1095.6** | **21.3** | **21.7** |
| SELLVEQYLPLTEEELEK.heavy | Yes | 724 | 962.5 | 21.3 | 21.7 |
| SELLVEQYLPLTEEELEK.heavy | Yes | 724 | 885.4 | 21.3 | 21.7 |
| SELLVEQYLPLTEEELEK.heavy | Yes | 724 | 548.3 | 21.3 | 21.7 |
| SELLVEQYLPLTEEELEK.heavy | Yes | 724 | 443.3 | 21.3 | 21.7 |
| **SELLVEQYLPLTEEELEK.light** | **No** | **721.4** | **1087.6** | **21.3** | **21.7** |
| SELLVEQYLPLTEEELEK.light | No | 721.4 | 962.5 | 21.3 | 21.7 |
| SELLVEQYLPLTEEELEK.light | No | 721.4 | 877.4 | 21.3 | 21.7 |
| SELLVEQYLPLTEEELEK.light | No | 721.4 | 544.3 | 21.3 | 21.7 |
| SELLVEQYLPLTEEELEK.light | No | 721.4 | 443.3 | 21.3 | 21.7 |

*Additional instrument settings for Agilent 6495 QqQ were positive polarity,* *fragmentor = 380 V, cell accelerator voltage = 5 V and retention time window = 3.5 min. The quantification SRM transitions are in bold.*

*1Internal standard*

**Supplemental Figure 1: Matrix matched calibration curves**

*The correlation between standard peptides concentrations in the breast milk and their responses. Calibration curves of TQL peptides after trypsin digestion (heavy standard) (1) and after normalization on native peptide (light) (2).*

**Supplemental Figure 2: Trypsin digestion optimization**
